# Supplementary material for: Porous metal microsphere M@C-rGO (metal = Mn, Fe, Co, Ni, Cu) aerogels with high low-frequency microwave absorption, strong thermal insulation and superior anticorrosion performance
Source: Royal Society of Chemistry journal article supplement (doi:10.1039/d4ta04051a), 2024-01-01
Supplement: d4ta04051a1.pdf [file d4ta04051a1.pdf]

## Supplementary Information

**Porous metal microsphere M@C-rGO (Metal = Mn, Fe, Co, Ni, Cu) aerogels  
with high low-frequency microwave absorption, strong thermal insulation and  
excellent anticorrosion performance**

**Junfeng Qiu<sup>a</sup>, Xin Liu<sup>a</sup>, Chunyi Peng<sup>a</sup>, Sihan Wang<sup>a</sup>, Rongchen Wang<sup>a</sup>, Wei  
Wang<sup>a,b\*</sup>**

<sup>a</sup> Department of Physics and Electronics, School of Mathematics and Physics, Beijing  
University of Chemical Technology, Beijing 100029, China

<sup>b</sup> Beijing Key Laboratory of Environmentally Harmful Chemical Analysis, Beijing  
University of Chemical Technology, Beijing 100029, China

---

\* Corresponding authors. E-mail: [wangwei@mail.buct.edu.cn](mailto:wangwei@mail.buct.edu.cn)

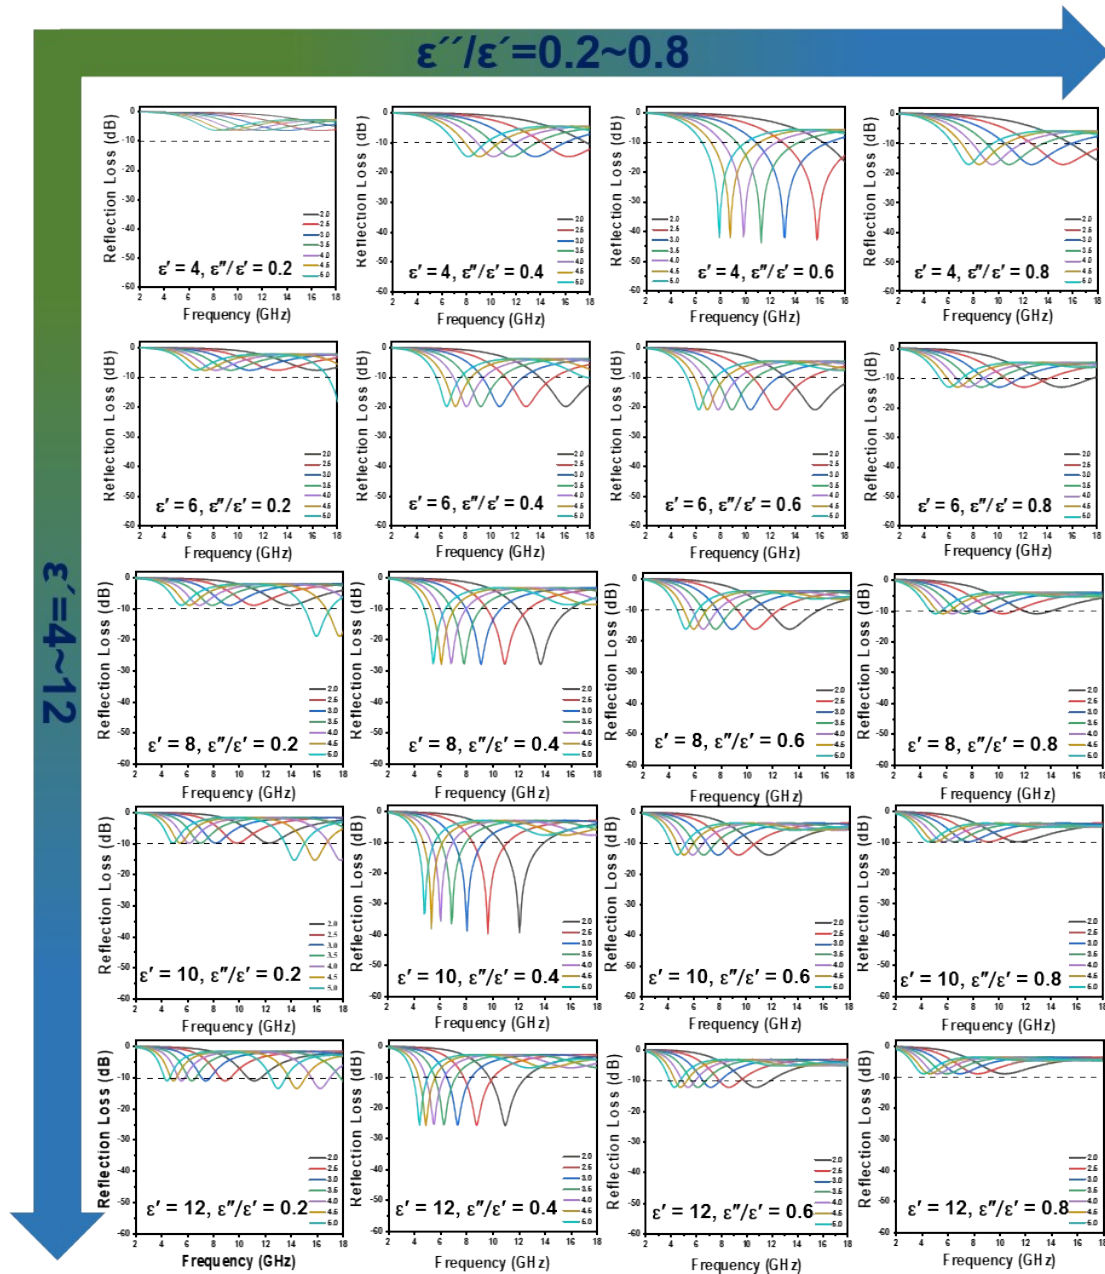

**Figure S1.** Numerical simulation of complex dielectric constant ( $\mu' = 1, \mu'' = 0$ ).

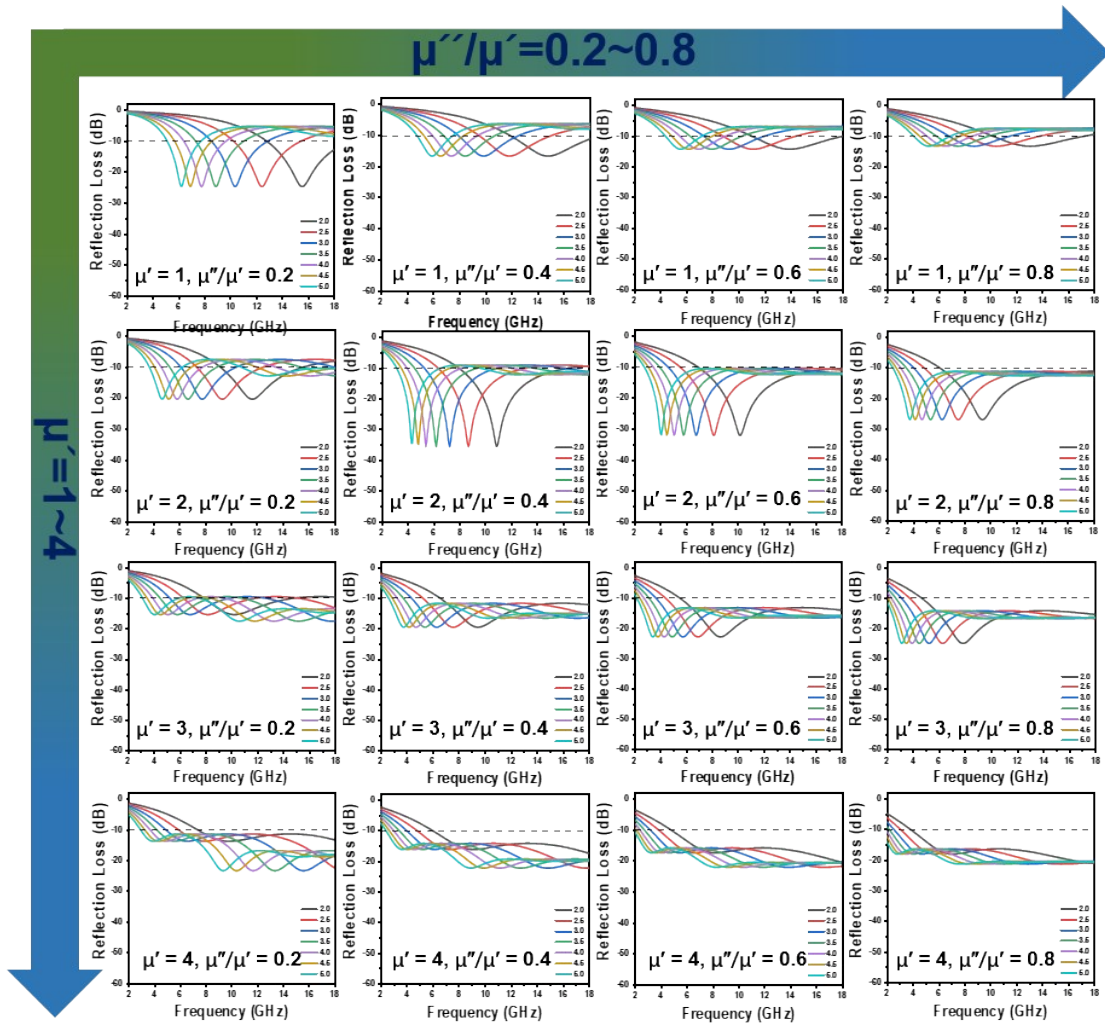

**Figure S2.** Numerical simulation of complex permeability ( $\epsilon' = 6$ ,  $\epsilon'' = 2.4$ ).

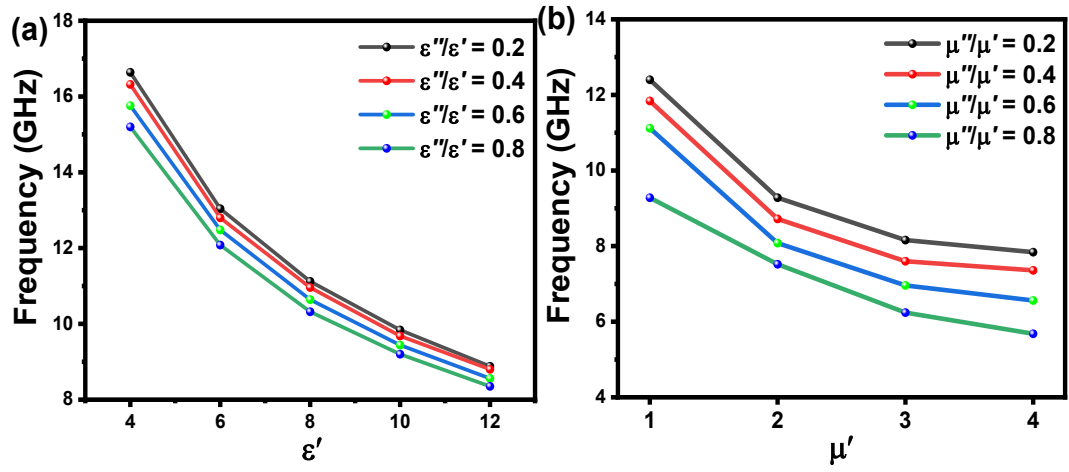

Figure S3. The  $RL_{\min}@Frequency$  for numerical simulations at a thickness of 2.5 mm.

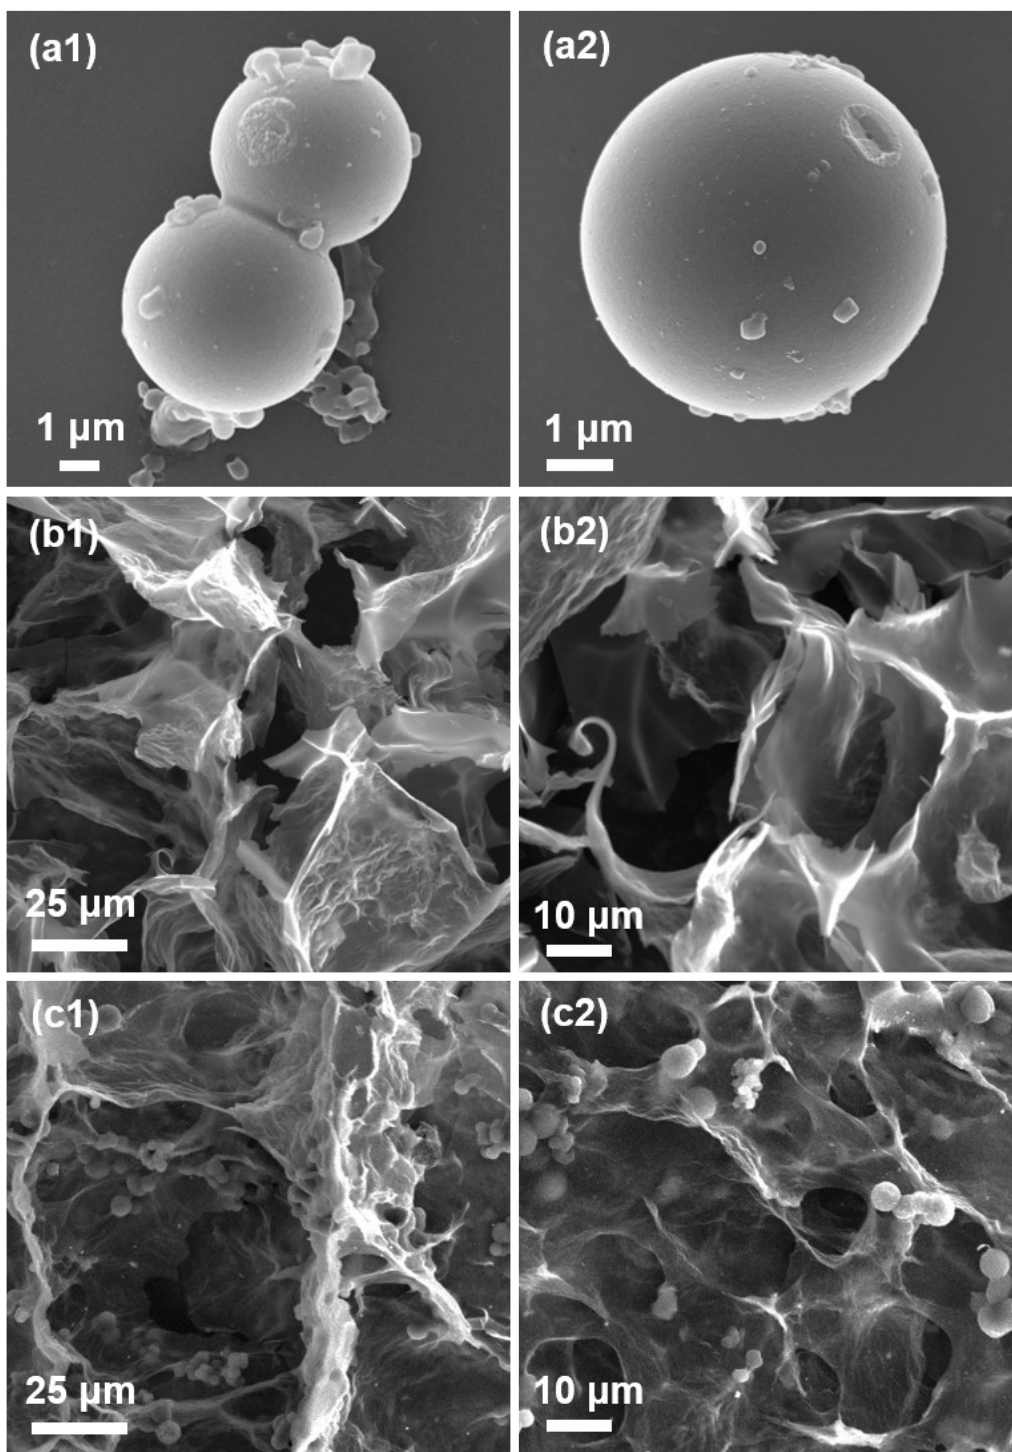

**Figure S4.** The SEM images of the sample a) Cu-p, b) C-rGO, c) Cu@C-rGO.

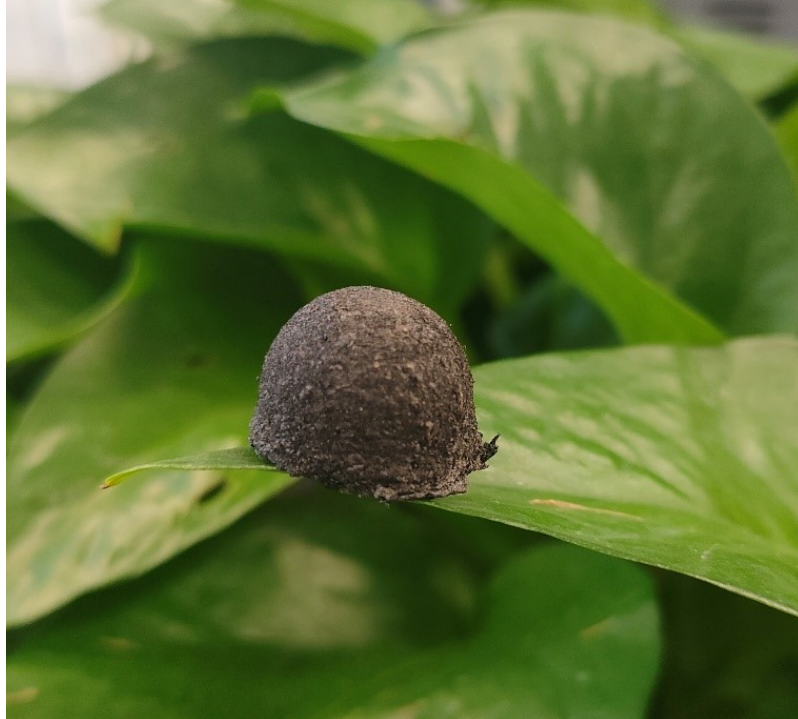

**Figure S5.** The actual images of the as-synthesized sample Cu@C-rGO.

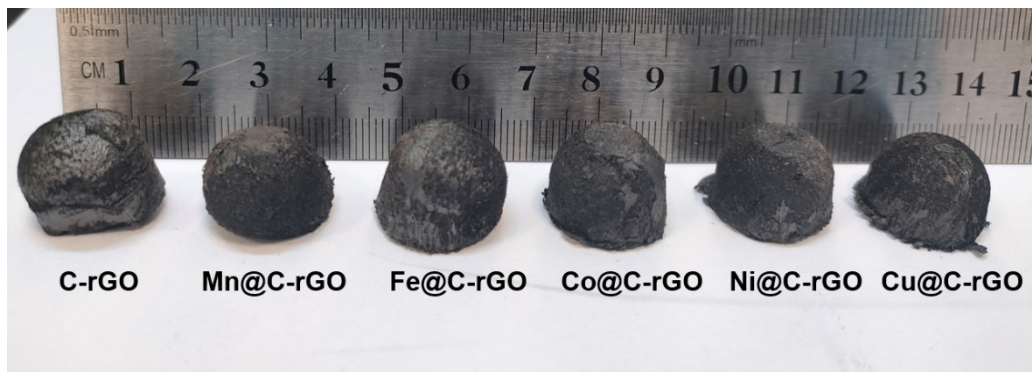

**Figure S6.** The actual images of the as-synthesized samples M@C-rGO.

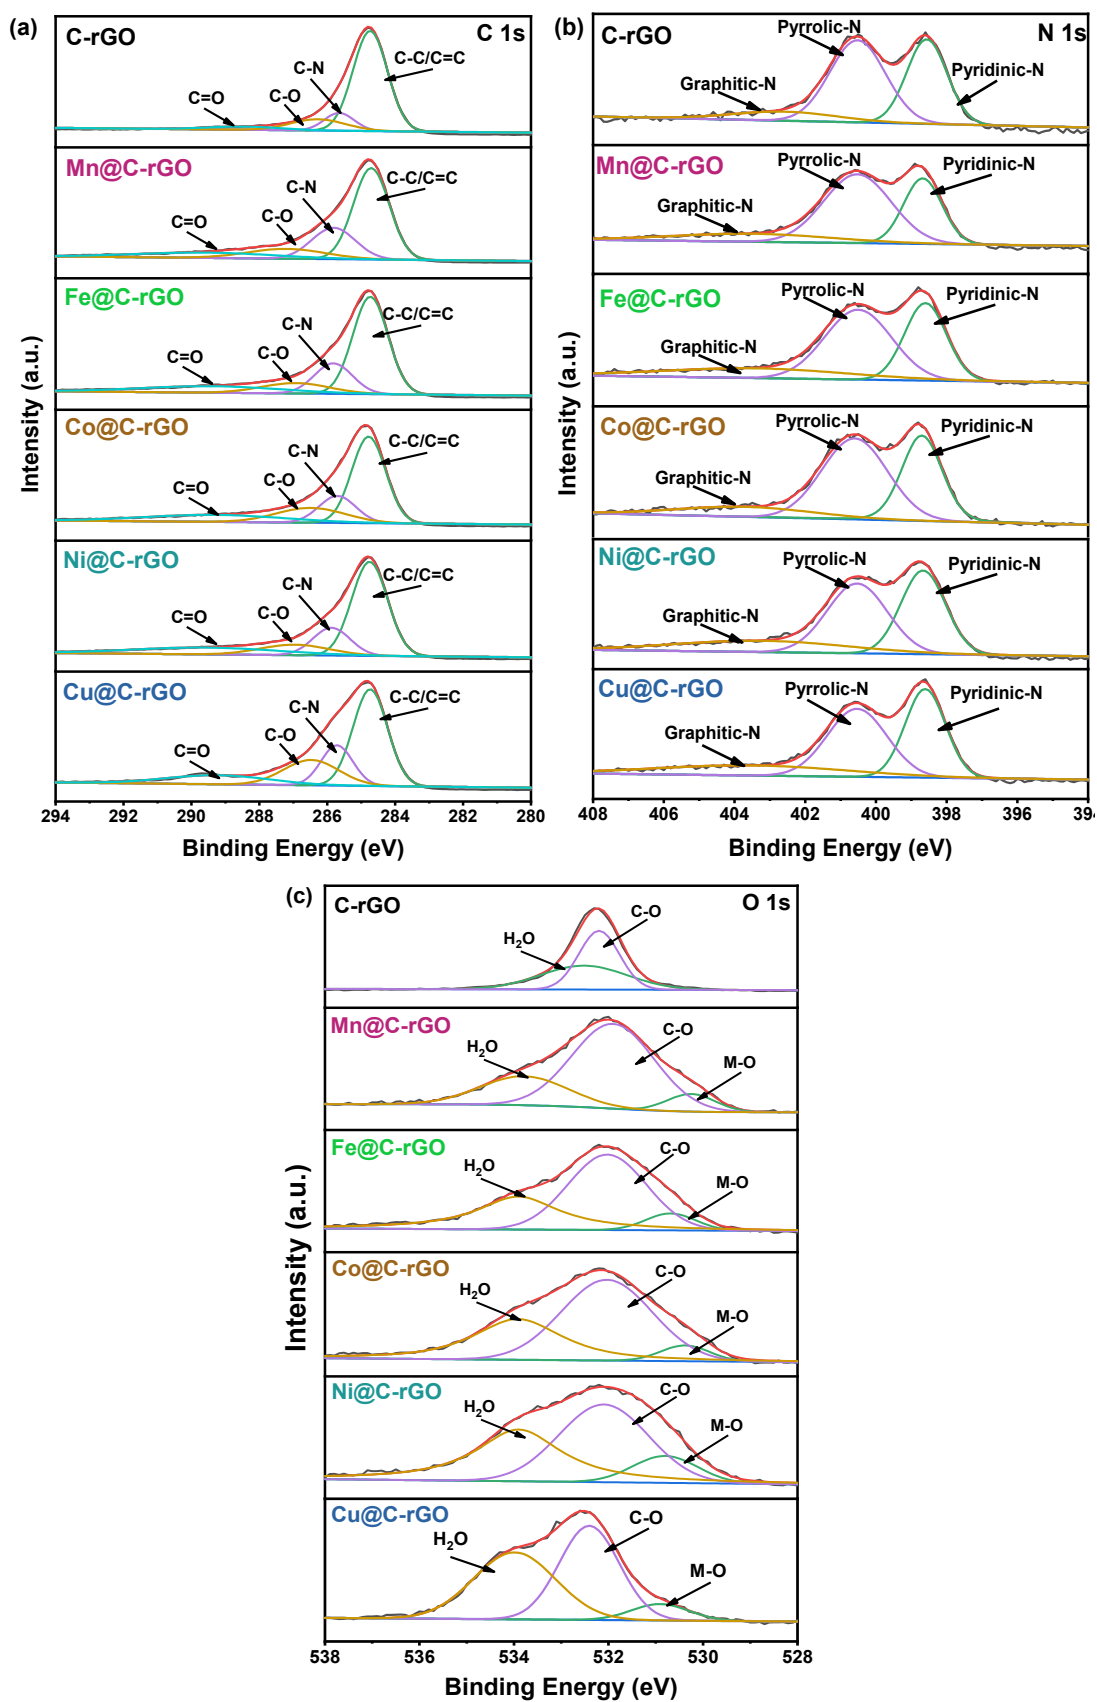

Figure S7. The high-resolution XPS spectra of a) C 1s, b) N 1s and c) O 1s.



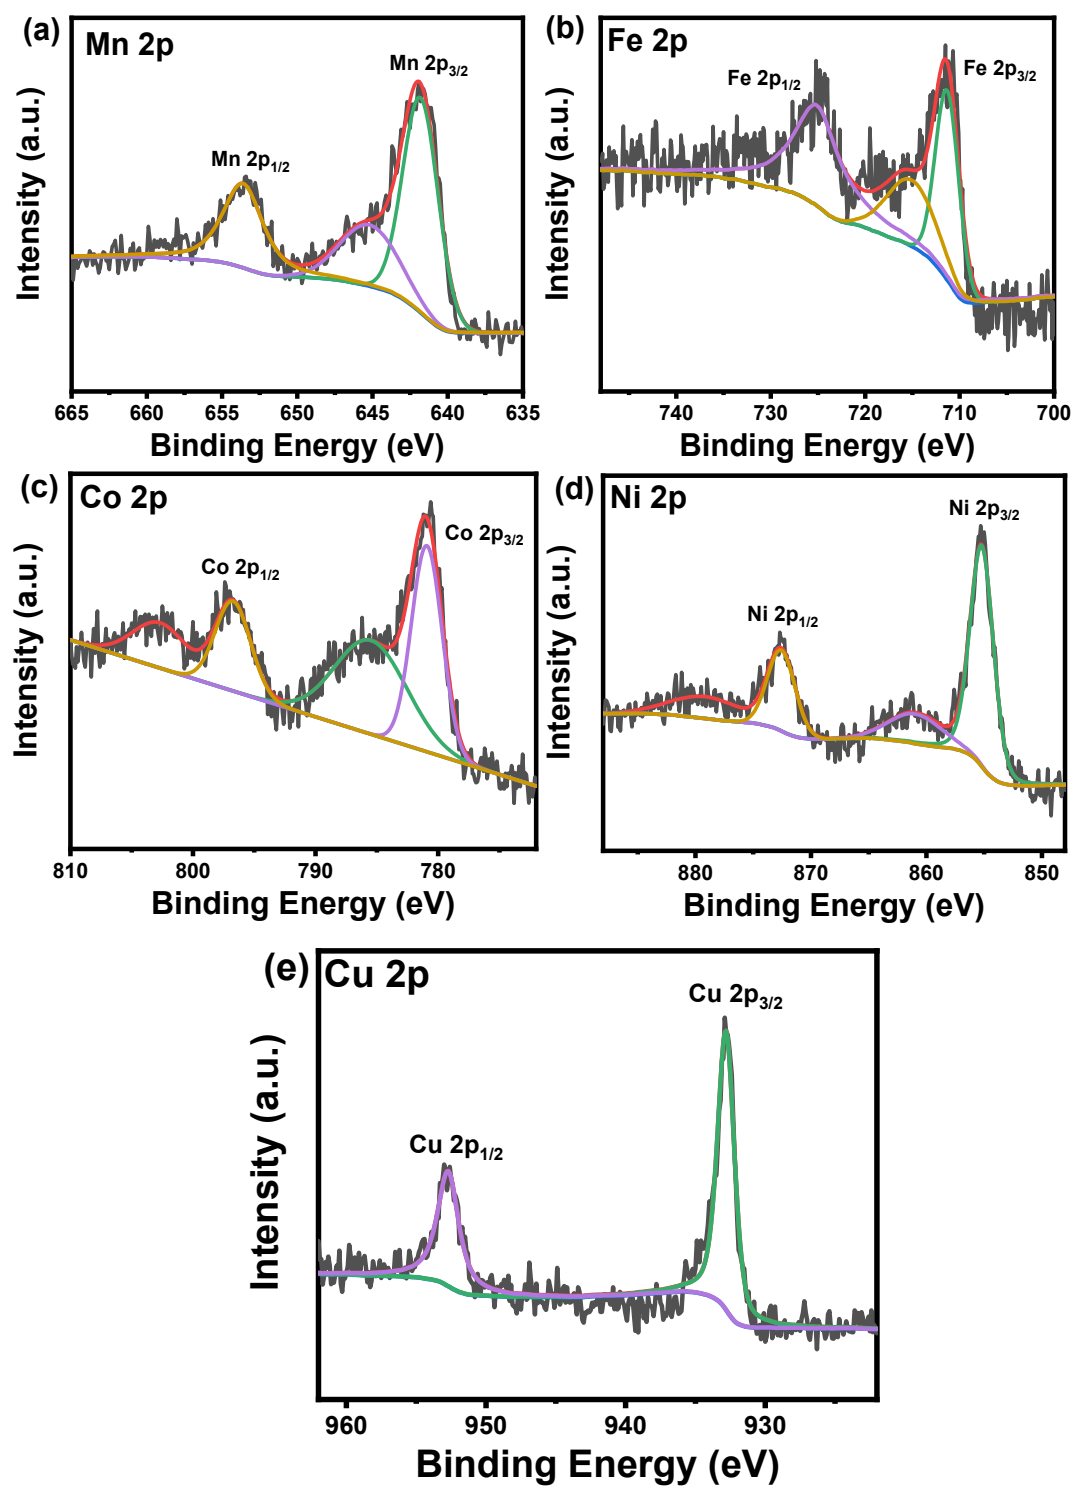

**Figure S8.** The high-resolution XPS spectra of a) Mn 2p, b) Fe 2p, c) Co 2p, d) Ni 2p and e) Cu 2p.

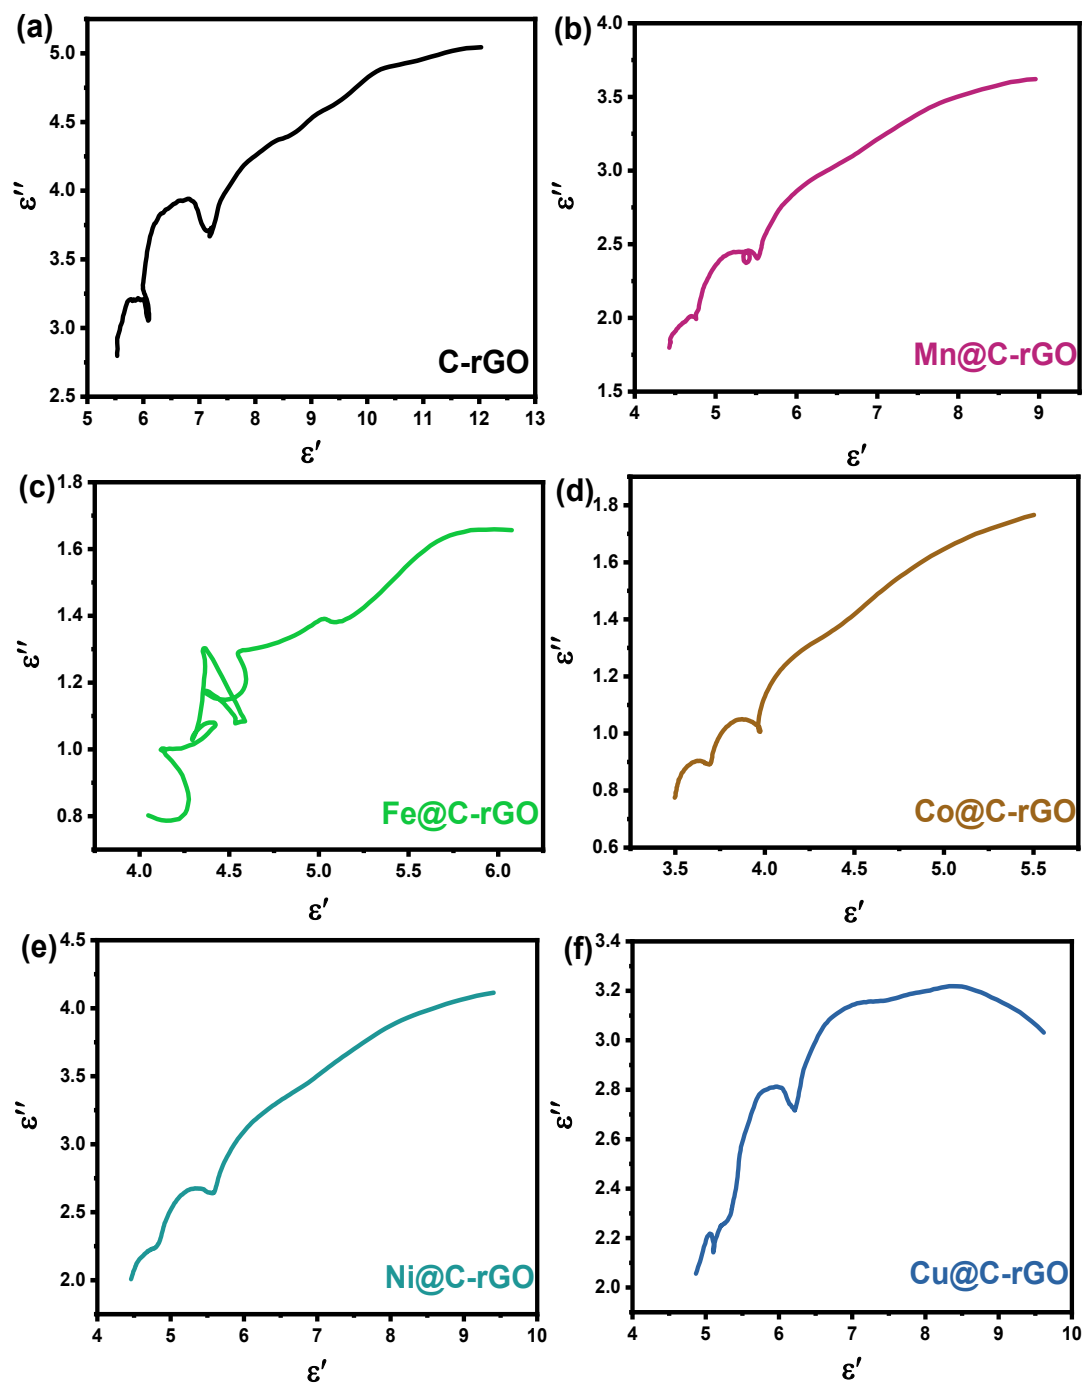

**Figure S9.** The Cole-Cole curves of a) C-rGO, b) Mn@C-rGO, c) Fe@C-rGO, d) Co@C-rGO, e) Ni@C-rGO and f) Cu@C-rGO.

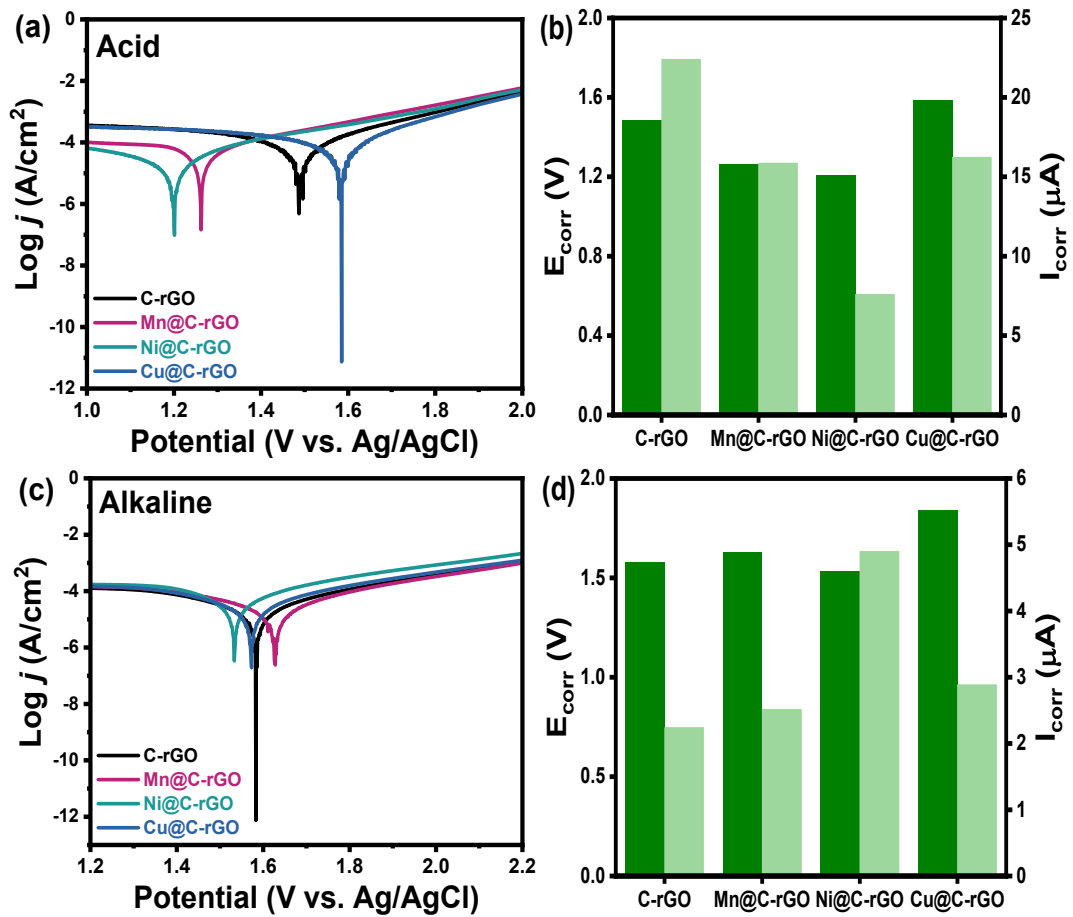

Figure S10. a, c) The Tafel curves and b, d) the  $I_{\text{corr}}$  and  $R_p$  in acidic and alkaline corrosion conditions.

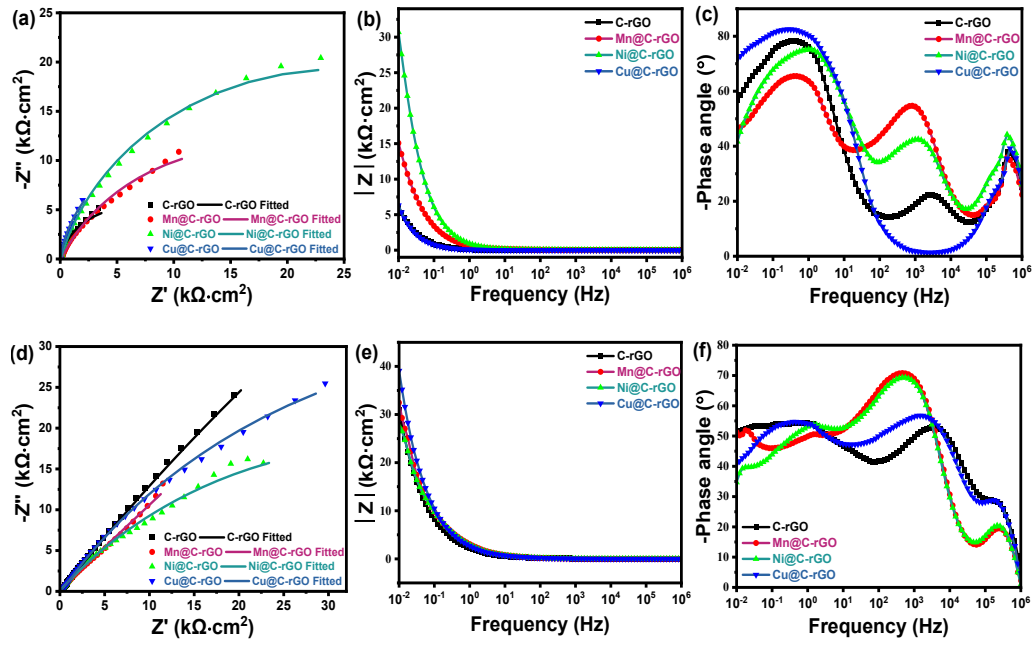

**Figure S11.** a, d) The Nyquist plots, b, e) Bode plots. c, f) Phase angle plots of in acidic and alkaline solutions.

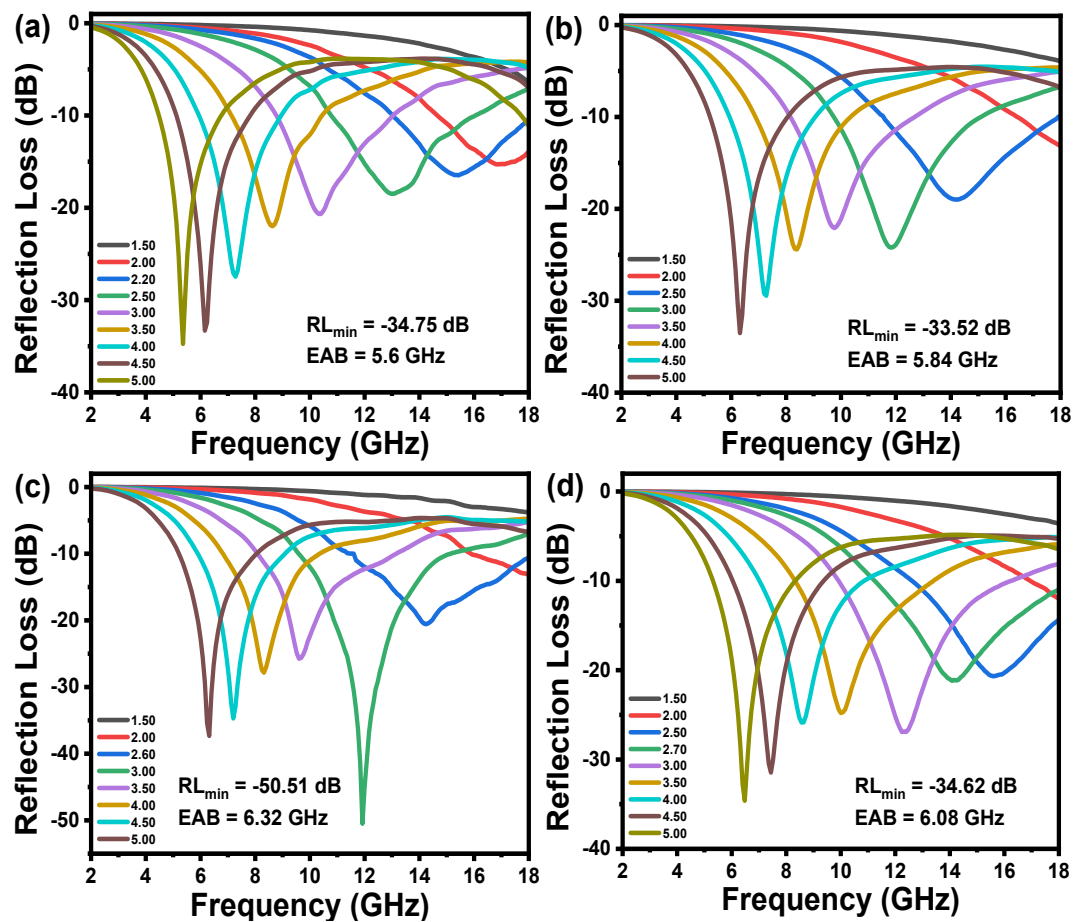

Figure S12. The RL values of a) C-rGO, b) Mn@C-rGO, c) Ni@C-rGO and d) Cu@C-rGO after 7 days of corrosion in 3.5 wt% NaCl solution.

**Table S1.** Comparison of the  $RL_{\min}$  and EAB of similar rGO-based.

| Sample                                                              | $RL_{\min}$ (dB) | $RL_{\min}$ @Frequency (GHz) | EAB (GHz) | Refs.     |
|---------------------------------------------------------------------|------------------|------------------------------|-----------|-----------|
| FePc/N-rGO                                                          | -49.3            | 5.4                          | 4.2       | [S1]      |
| Mo <sub>2</sub> TiC <sub>2</sub> T <sub>x</sub> /RGO                | -55.1            | 13.8                         | 5.7       | [S2]      |
| NiO@NiFe <sub>2</sub> O <sub>4</sub> /rGO                           | -55              | 16.88                        | 6.4       | [S3]      |
| RGO/GDY                                                             | -58              | 8.3                          | 4.3       | [S4]      |
| Ti <sub>3</sub> C <sub>2</sub> T <sub>x</sub> /rGO/NiO              | -62.98           | 7.5                          | 3.1       | [S5]      |
| Ti <sub>3</sub> C <sub>2</sub> T <sub>x</sub> @rGO@MoS <sub>2</sub> | -54.2            | 16.07                        | 6.04      | [S6]      |
| rGO/MXene/TiO <sub>2</sub> /Fe <sub>2</sub> C                       | -67.4            | 8.89                         | 5.68      | [S7]      |
| HAg/PANI/GO                                                         | -61.14           | 11.32                        | 4.77      | [S8]      |
| AgNWs@NGAs                                                          | -79.99           | 13.92                        | 3.5       | [S9]      |
| RGO/CNTs/GDY                                                        | -51.8            | 16.5                         | 5.4       | [S10]     |
| La <sub>0.8</sub> CoO <sub>3</sub> -rGO                             | -62.34           | 12.88                        | 6.08      | [S11]     |
| N-doped rGO/g-C <sub>3</sub> N <sub>4</sub>                         | -49.59           | 15.3                         | 4.56      | [S12]     |
| MoS <sub>2</sub> /PPy/rGO                                           | -53.5            | 11.76                        | 5.36      | [S13]     |
| MXene/rGO                                                           | -44.3            | 7.06                         | 4.84      | [S14]     |
| Co@N-RGO                                                            | -48.9            | 11.8                         | 6.0       | [S15]     |
| Ni-MOF-rGO                                                          | -51.19           | 17.52                        | 6.32      | [S16]     |
| Mn@C-rGO                                                            | -53.42           | 6.88                         | 6.16      | This work |
| Ni@C-rGO                                                            | -53.64           | 7.92                         | 6.64      | This work |
| Cu@C-rGO                                                            | -59.28           | 7.6                          | 6.32      | This work |

**Table S2.** The  $R_{ct}$  values under acidic, neutral, and alkaline environments.

| Sample   | $R_{ct}$ under acid<br>( $\Omega \text{ cm}^2$ ) | $R_{ct}$ under alkaline<br>( $\Omega \text{ cm}^2$ ) | $R_{ct}$ under neutral<br>( $\Omega \text{ cm}^2$ ) |
|----------|--------------------------------------------------|------------------------------------------------------|-----------------------------------------------------|
| C-rGO    | $1.246 \times 10^4$                              | $4.504 \times 10^5$                                  | $5.841 \times 10^5$                                 |
| Mn@C-rGO | $2.850 \times 10^4$                              | $3.034 \times 10^5$                                  | $3.971 \times 10^5$                                 |
| Ni@C-rGO | $4.615 \times 10^4$                              | $1.191 \times 10^5$                                  | $2.885 \times 10^5$                                 |
| Cu@C-rGO | $3.398 \times 10^4$                              | $1.382 \times 10^5$                                  | $1.421 \times 10^5$                                 |

## References:

- [S1] J. Zhang, L. Chen, X. Li, H. Cao, W. Chen, X. Wang, Regulation dipole moments of n-doped graphene coordinated with FePc toward highly efficient microwave absorption performance in c band, *Small* (2024) 2308459.
- [S2] M. Ling, F. Ge, F. Wu, L. Zhang, Q. Zhang, B. Zhang, Effect of crystal transformation on the intrinsic defects and the microwave absorption performance of  $\text{Mo}_2\text{TiC}_2\text{T}_x/\text{RGO}$  microspheres, *Small* 20 (2024) 2306233.
- [S3] L. Yao, Y. Wang, J. Zhao, Y. Zhu, M. Cao, Multifunctional nanocrystalline-assembled porous hierarchical material and device for integrating microwave absorption, electromagnetic interference shielding, and energy storage, *Small* 19 (2023) 2208101.
- [S4] M. Ling, F. Wu, P. Liu, Q. Zhang, B. Zhang, Fabrication of graphdiyne/graphene composite microsphere with wrinkled surface via ultrasonic spray compounding and its microwave absorption properties, *Small* 19 (2023) 2205925.
- [S5] F. Zhang, S. Shang, Y. Li, B. Fan, R. Zhang, B. Zhao, H. Lu, C. Ma, Tunable electromagnetic properties of  $\text{Ti}_3\text{C}_2\text{T}_x/\text{rGO}$  foams decorated with NiO particles, *CrystEngComm* 24 (2022) 5949-5957.
- [S6] Y. Wang, R. Ding, Y. Zhang, B. Liu, Q. Fu, H. Zhao, Y. Wang, Gradient hierarchical hollow heterostructures of  $\text{Ti}_3\text{C}_2\text{T}_x@\text{rGO}@\text{MoS}_2$  for efficient microwave absorption, *ACS Appl. Mater. Interfaces* 15 (2023) 32803-32813.
- [S7] G. Wang, C. Li, D. Estevez, P. Xu, M. Peng, H. Wei, F. Qin, Boosting interfacial polarization through heterointerface engineering in MXene/graphene intercalated-based microspheres for electromagnetic wave absorption, *Nano-Micro Lett.* 15 (2023) 152.
- [S8] W. Fu, W. Yang, C. Qian, Y. Fu, Y. Zhu, One-pot synthesis of Ag/AgCl heterojunction nanoparticles on polyaniline nanocone arrays on graphene oxide for microwave absorption, *ACS Appl. Nano Mater.* 6 (2023) 3728-3737.
- [S9] X. Shu, S. Yan, B. Fang, Y. Song, Z. Zhao, A 3D multifunctional nitrogen-doped RGO-based aerogel with silver nanowires assisted self-supporting networks for enhanced electromagnetic wave absorption, *Chem. Eng. J.* 451 (2023) 138825.



- [S10] M. Ling, P. Liu, F. Wu, B. Zhang, Three-dimensional RGO/CNTs/GDY assembled microsphere: Bridging-induced electron transport enhanced microwave absorbing mechanism, *Carbon* 214 (2023) 118351.
- [S11] L. Chang, Y. Wang, X. Zhang, L. Li, H. Zhai, M. Cao, Toward high performance microwave absorber by implanting  $\text{La}_{0.8}\text{CoO}_3$  nanoparticles on rGO, *J. Colloid Interface Sci.* 174 (2024) 176-187.
- [S12] Q. Su, Y. He, D. Liu, K. Jia, L. Xia, X. Huang, B. Zhong, Facile fabrication of ultra-light N-doped-rGO/g- $\text{C}_3\text{N}_4$  for broadband microwave absorption, *J. Colloid Interface Sci.* 650 (2023) 47-57.
- [S13] S. Liu, D. Fang, F. Xing, H. Jin, J. Li, Auricularia-shaped  $\text{MoS}_2$  nanosheet arrays coated hierarchical multilayer  $\text{MoS}_2$ /PPy/rGO composites for efficient microwave absorption, *Chem. Eng. J.* 479 (2024) 147613.
- [S14] X. Li, D. Xu, D. Zhou, S. Pang, C. Du, M. Darwish, T. Zhou, S. Sun, Vertically stacked heterostructures of MXene/rGO films with enhanced gradient impedance for high-performance microwave absorption, *Carbon* 208 (2023) 374-383.
- [S15] L. Wang, R. Mao, M. Huang, H. Jia, Y. Li, X. Li, Y. Cheng, J. Liu, J. Zhang, L. Wu, R. Che, Heterogeneous interface engineering of high-density MOFs-derived Co nanoparticles anchored on N-doped RGO toward wide-frequency electromagnetic wave absorption, *Mat. Today Phys.* 35 (2023) 101128.
- [S16] K. Cao, X. Yang, R. Zhao, W. Xue, Fabrication of an Ultralight Ni-MOF-rGO aerogel with both dielectric and magnetic performances for enhanced microwave absorption: Microspheres with hollow structure grow onto the GO nanosheets, *ACS Appl. Mater. Interfaces* 15 (2023) 9685-9696.
